# Supplementary material
Source: MDPI journal article supplement (https://www.mdpi.com/2304-6775/12/2/11)
Supplement: s1 [file s1]

Archive with 3 entries (3 files):
- publications-2876630 - SM1-done.pdf
- publications-2876630 SM_02_Custom_Model_Instructions-done.pdf
- publications-2876630 SM_03_Prompt_Script_Output-done.pdf
